# Supplementary material
Source: publisher figshare collection journal article supplement (https://karger.figshare.com/ndownloader/files/33079649)
Supplement: Supplementary file 1 [file 33079649]

**eTable 1. Quality assessment of Diagnostic Accuracy Studies (QUADAS) checklist quality assessment of all studies included in this systematic review**

|  | Spectrum composition | Selection criteria | Appropriate reference standard | Disease progression bias | Partial verification bias | Differential verification bias | Incorporation bias | Test execution details | Reference execution details | Test review bias | Diagnostic review bias | Clinical review bias | Uninterpretable results | Withdrawals | Score |
| --- | --- | --- | --- | --- | --- | --- | --- | --- | --- | --- | --- | --- | --- | --- | --- |
| Alfageme, 2019 | Y | N | Y | U | Y | Y | Y | Y | N | U | Y | Y | U | Y | 9 |
| Ballester-Sanchez, 2014 | Y | Y | Y | Y | Y | Y | Y | Y | Y | U | Y | Y | U | Y | 12 |
| Bens, 2015 | Y | Y | Y | U | Y | Y | Y | N | N | Y | Y | Y | U | Y | 10 |
| Bobadilla, 2008 | Y | Y | Y | Y | Y | Y | N | Y | Y | Y | Y | Y | Y | Y | 13 |
| Crisan, 2013 | Y | Y | Y | U | Y | Y | Y | Y | Y | Y | U | Y | U | Y | 11 |
| Desai, 2007 | U | Y | Y | Y | Y | Y | Y | N | N | U | U | Y | U | Y | 8 |
| Goyal, 2017 - A | Y | Y | Y | U | Y | Y | Y | Y | N | U | Y | Y | U | Y | 10 |
| Goyal, 2017 - B | Y | Y | Y | U | Y | Y | Y | Y | N | U | Y | Y | U | Y | 10 |
| Hernandez-Ibanez, 2014 | Y | Y | Y | Y | Y | Y | Y | N | N | Y | Y | Y | U | Y | 11 |
| Hernandez-Ibanez, 2017 | Y | Y | Y | Y | Y | Y | Y | N | Y | Y | Y | Y | U | Y | 12 |
| Hinz, 2012 | Y | N | Y | Y | Y | Y | Y | Y | Y | Y | Y | Y | U | Y | 12 |
| Jambusaria-Pahlajani, 2009 | Y | Y | Y | Y | Y | Y | Y | Y | Y | U | Y | Y | U | Y | 12 |
| JovaNvic, 2005 | N | N | Y | U | Y | Y | Y | Y | Y | Y | Y | Y | Y | Y | 11 |
| Khlebnikova, 2018 | Y | Y | Y | Y | Y | Y | Y | Y | Y | Y | N | Y | U | Y | 12 |
| Khlebnikova, 2020 | Y | Y | Y | Y | Y | Y | Y | Y | Y | Y | Y | Y | Y | Y | 14 |
| Lippert, 2013 | Y | Y | Y | U | Y | Y | Y | N | N | Y | U | Y | Y | Y | 10 |
| Marmur, 2010 | Y | Y | Y | U | Y | Y | Y | Y | U | Y | Y | Y | Y | Y | 12 |
| Mogensen, 2009 | Y | Y | Y | Y | Y | Y | Y | Y | Y | U | Y | Y | U | Y | 12 |
| Nassiri-Kashani, 2013 | Y | Y | Y | Y | Y | Y | Y | Y | Y | Y | Y | Y | U | Y | 13 |
| Pasquali, 2016 | Y | Y | Y | Y | Y | Y | Y | Y | N | Y | Y | Y | U | Y | 12 |
| Raszewska-Famielec, 2020 | Y | Y | Y | Y | Y | Y | Y | Y | N | U | Y | Y | U | Y | 11 |
| Smucler , 2012 | Y | Y | Y | U | Y | Y | Y | N | N | Y | Y | Y | U | Y | 10 |
| Song, 2014 | Y | Y | Y | U | Y | Y | Y | Y | Y | Y | N | Y | Y | Y | 12 |
| Tormo, 2014 | Y | Y | Y | U | Y | Y | Y | Y | N | Y | Y | N | U | Y | 10 |
| Uhara, 2007 | N | Y | Y | U | Y | Y | Y | Y | Y | Y | Y | N | U | Y | 10 |
| Vilas-Sueiro, 2018 | Y | Y | Y | Y | Y | Y | Y | Y | N | Y | Y | Y | U | Y | 12 |
| Wang, 2019 | Y | Y | Y | U | Y | Y | Y | N | Y | Y | Y | N | U | Y | 10 |
| Wenande, 2020 | Y | Y | Y | Y | Y | Y | Y | Y | N | Y | Y | Y | U | Y | 12 |
| Wortsman X, 2010 | N | N | Y | Y | Y | Y | Y | Y | N | Y | Y | N | U | Y | 9 |
| Wortsman, 2015 | Y | Y | Y | U | Y | Y | Y | Y | Y | Y | Y | N | U | Y | 11 |
| Y, yes; N, no; U, uncertain | | | | | | | | | | | | | | | |

**eTable 2. Lesion type and analysis (pooled vs separate) of BCCs per study**

|  | Total number of lesions | Number of BCCs | Other lesions included | Analysis (exclusively BCC, pooled or separate) |
| --- | --- | --- | --- | --- |
| Alfageme, 2019 | 31 | 31 | - | Exclusively BCC |
| Ballester-Sanchez, 2014 | 20 | 20 | - | Exclusively BCC |
| Bens, 2015 | 77 | 33 | 39 benign lesions, 4 epidermoid carcinomas, 1 AK | Separate |
| Bobadilla, 2008 | 29 | 29 | - | Exclusively BCC |
| Crisan, 2013 | 46 | 18 | 8 superficial spreading melanomas, 20 nodular melanomas | Separate |
| Desai, 2007 | 50 | 50 | - | Exclusively BCC |
| Goyal, 2017 - A | 20 | 17 | 3 SCCs | Pooled |
| Goyal, 2017 – B | 14 | 9 | 5 SCCs | Pooled |
| Hernandez-Ibanez, 2014 | 7 | 7 | - | Exclusively BCC |
| Hernandez-Ibanez, 2017 | 156 | 156 | - | Exclusively BCC |
| Hinz, 2012 | 10 | 10 | - | Exclusively BCC |
| Jambusaria-Pahlajani, 2009 | 98 | 77 | 21 SCCs | Pooled |
| Jovanovic, 2005 | 35 | 12 | 9 nevus pigmentosus, 3 dysplastic nevus, 3 dermatofibromas, 2 fibropapillomas, 2 SK, 1 malignant melanoma, 1 lipofibroma, 1 neurofibroma, 1 AK | Pooled |
| Khlebnikova, 2018 | 60 | 60 | - | Exclusively BCC |
| Khlebnikova, 2020 | 27 | 27 | - | Exclusively BCC |
| Lippert, 2013 | 56 | 56 | - | Exclusively BCC |
| Marmur, 2010 | 20 | 9 | 11 SCCs | Separate |
| Mogensen, 2009 | 34 | 23 | 11 AKs | Pooled |
| Nassiri-Kashani, 2013 | 56 | 56 | - | Exclusively BCC |
| Pasquali, 2016 | 100 | 79 | 5 SCCs, 7 nevi, 5 dermatofibromas, 4 cysts | Pooled |
| Raszewska-Famielec, 2020 | 70 | 70 | - | Exclusively BCC |
| Smucler , 2012 | 75 | 75 | - | Exclusively BCC |
| Song, 2014 | 47 | 10 | 28 SCCs, 4 AKs, 2 keratoacanthomas, 1 verrucous carcinoma, 1 atypical poroma, 1 SK | Pooled |
| Tormo, 2014 | 45 | 45 | - | Exclusively BCC |
| Uhara, 2007 | 85 | 29 | 56 melanomas | Separate |
| Vilas-Sueiro, 2018 | 58 | 58 | - | Exclusively BCC |
| Wang, 2019 | 46 | 46 | - | Exclusively BCC |
| Wenande, 2020 | 19 | 19 | - | Exclusively BCC |
| Wortsman X, 2010 | 4338 | 41 | 75 malignant tumors (of which 6 cutaneous metastases, 18 SCCs and 41 BCCs). Also 1998 benign nonvascular tumors, 400 benign vascular tumors, 48 vascular nontumoral lesions, 757 articular and periarticular lesions, 677 inflammatory and infections lesions, 146 exogenous skin components, 237 nail lesions | Pooled* |
| Wortsman, 2015 | 31 | 31 | - | Exclusively BCC |
| BCC, basal cell carcinoma; AK, actinic keratosis; SCC, squamous cell carcinoma; SK, seborrheic keratosis; *data for all 75 malignant tumors was pooled and analyzed together | | | | |
